# Supplementary material
Source: PubMed Central journal article supplement (PMC3612686)
Supplement: 1220157110_pnas.201220157SI.pdf [file 1220157110_pnas.201220157SI.pdf]

# Supporting Information

Shis and Bennett 10.1073/pnas.1220157110

## In Vivo Activity of Split T7 RNAP

We began our study by comparing the in vivo activity of full-length versus split T7 RNA polymerase (T7 RNAP). Rather than present fold induction, here we present the development of GFP fluorescence normalized to OD<sub>600</sub> over time, as shown in Fig. S1. Although GFP expression with full-length T7 RNAP was found to be high even if isopropyl β-D-1-thiogalactopyranoside (IPTG) was not used to de-repress P<sub>T7lacO</sub>, at concentrations of arabinose above 10 mM, the expression of GFP drops precipitously. This drop in GFP expression corresponds to the appearance of a seven-base pair insertion that truncates the T7 RNAP coding sequence when plasmid isolated from cell culture postinduction was sequenced. The cultures at 100 and 200 mM arabinose reach the same final OD<sub>600</sub> at the end of the experiment, suggesting the observed GFP fluorescence at 100 and 200 mM corresponds to fluorescent protein produced early on in the experiment. This contrasts the case with split T7 RNAP where GFP expression is stable and saturates at high levels of arabinose.

## Pulse Chase Analysis of Full vs. Split T7 RNAP

To characterize the relative stability of full-length vs. split T7 RNAP, we performed pulse chase analysis of expression systems using either versions of the polymerase. We cotransformed pET28:GFP with either pTara:500 or pTSara into DH10B and then assayed GFP expression over time. Individual colonies were inoculated into selective LB media and grown to stationary phase. Stationary phase cell culture was inoculated in triplicate into 50 mL selective LB media containing 1 mM arabinose at 1% (vol/vol) for 5 h. Cultures were then spun down at 5,000 relative centrifugal force for 2 min twice in LB media without inducer. The samples were then incubated at 37 °C with shaking at 200 rpm for the remainder of the experiment. Every hour, 200-μL samples were taken and assayed for GFP fluorescence (ex:488, em:510) and OD<sub>600</sub> (Infinite M1000, Tecan). Compared with the

fluorescence associated with the full-length protein, the decrease in fluorescence with split T7 RNAP is comparable to the decrease in fluorescence with full-length T7 RNAP.

## Characterizing the Promoter Specificity of Split T7 RNAP Mutants

To characterize the change in specificity resulting from single amino-acid mutations in the specificity loop, we did 30 pairwise transformations of pTSara-Mut variants with pET:NNNN:GFP variants, where Mut denotes one of the point mutations [Q758C, R756K,R756S,N748D] and NNNN denotes base pairs -11 to -8 of P<sub>T7</sub> on the plasmid (Fig. S3A). Here we plot the normalized GFP fluorescence to OD<sub>600</sub> to better characterize the magnitude of GFP expression observed in our expression systems (Fig. S3B).

In the case of pTSara-wt+pET:GACT:GFP, where one would expect high fold induction of GFP fluorescence, the difference between uninduced vs. induced case is still quite substantial, despite higher levels of uninduced GFP fluorescence. In addition, to demonstrate marked preference for a particular mutant P<sub>T7</sub>, mutant split T7 RNAP also demonstrates different abilities to drive GFP expression, depending on the promoter it is tasked on. This may provide additional options to regulate the activity of mutant split T7 RNAP.

## Characterizing the Two-Input Function of Split T7 RNAP

To characterize the two-input function of mutant split T7 RNAP, we cotransformed pTSlb-wt, pTSlb-Q758C, pTSlb-R756K, pTSlb-R756S, and pTSlb-N748D with pET:GACT:GFP, pET:GACG:GFP, pET:ACAT:GFP, pET:GCAT:GFP, and pET:CCCT:GFP, respectively, and then assayed GFP expression as a function of arabinose and IPTG (Fig. S4A). Here we plot the normalized GFP fluorescence to OD<sub>600</sub> with no inducer, 10 mM arabinose, 10 mM IPTG, and 10 mM arabinose plus 10 mM IPTG (Fig. S4B).
